# Supplementary material for: Cohort profile: The Czech Health, Alcohol and Psychosocial factors In Eastern Europe study (HAPIEE-CZ)
Source: Research Square preprint supplement (doi:10.21203/rs.3.rs-8261173/v1), 2026-04-09
Supplement: Supplementary file 1 [file 1a77460bf2c23074e670bec2.docx]

**Cohort profile update: The Czech Health, Alcohol and Psychosocial factors In Eastern Europe study (HAPIEE-CZ)**

**Supplementary Information**

| **Supplementary Table 1 Baseline demographic, health-related and lifestyle characteristics of the Czech HAPIEE participants and non-participants in Wave 3 (2023-2024)** | | | | | |
| --- | --- | --- | --- | --- | --- |
|  | PS & PE | PS only | NRQ | Not participated | Dead |
| Total | 1,519 | 831 | 533 | 3,229 | 2,744 |
| ***Demographic characteristics at baseline*** | | | | |  |
| Age, mean | 55.0 | 56.9 | 59.3 | 55.5 | 62.2 |
| Single, % | 2.5 | 1.5 | 2.5 | 2.6 | 3.0 |
| Married/cohabiting, % | 78.1 | 80.0 | 78.2 | 74.3 | 74.0 |
| Divorced, % | 14.0 | 11.0 | 8.7 | 14.2 | 11.0 |
| Widowed, % | 5.4 | 7.5 | 10.6 | 8.9 | 12.0 |
| Low educated (incomplete, primary, vocational), % | 33.3 | 38.7 | 48.3 | 53.9 | 58.0 |
| High educated (secondary, university), % | 66.7 | 61.3 | 51.7 | 46.1 | 42.0 |
| ***General health and limitations at baseline*** | | | | |  |
| Poor/very poor self-rated health,% | 6.2 | 5.8 | 6.4 | 9.9 | 18.5 |
| Very limited when climbing several flights of stairs, % | 2.9 | 4.9 | 6.8 | 9.0 | 17.0 |
| Very limited when walking 1 km, % | 1.2 | 1.8 | 3.2 | 4.2 | 10.7 |
| ***Lifestyle characteristics at baseline*** | | | | |  |
| Current smokers, % | 20.8 | 24.0 | 21.4 | 27.6 | 30.0 |
| Alcohol consumption at least once a week,% | 49.5 | 44.3 | 41.0 | 41.3 | 38.7 |
| PS – postal survey; PE – physical examination; NRQ – non-respondent questionnaire  Note: Descriptive statistics conducted based on data measured at baseline (2002-2005). Dead participants deceased prior to invitation to the follow-up re-examination (before 1st March, 2023). | | | | | |

**
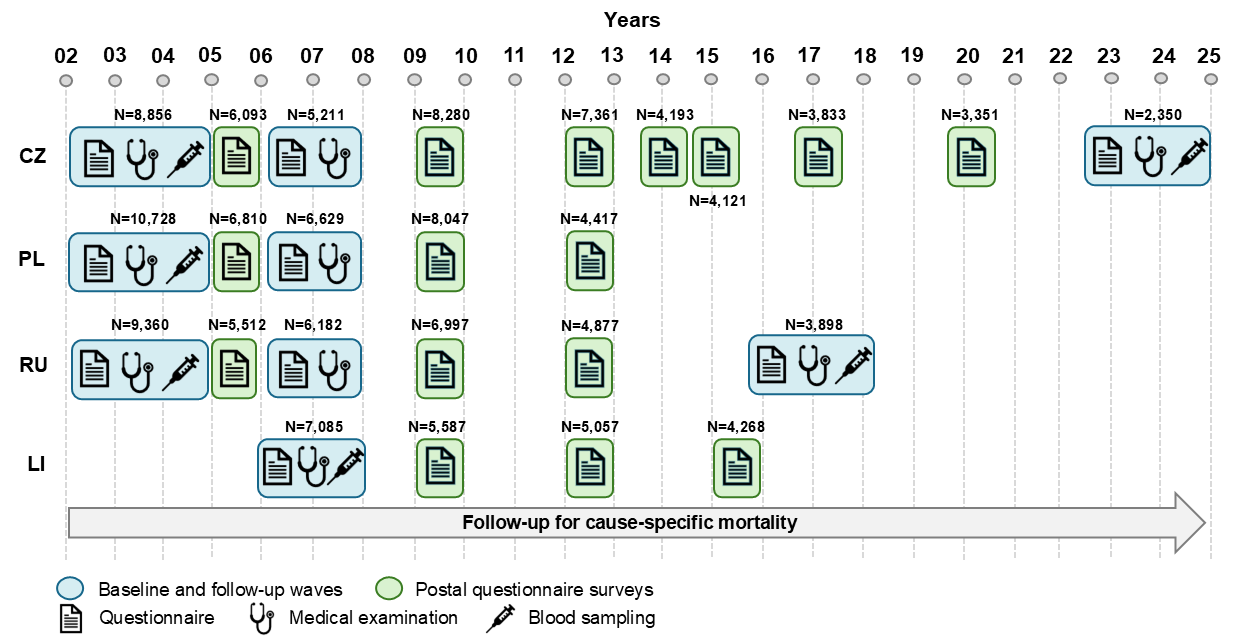
**

Supplementary Figure 1. Timeline of data collection in four countries of the HAPIEE study
